# Supplementary material
Source: PubMed Central journal article supplement (PMC4335377)
Supplement: supp_22.2.121_Supplementary_table_1.pdf [file supp_22.2.121_Supplementary_table_1.pdf]

**Supplemental Table 1.** *SDHx* mutation screening LightScanner primer list

| Name    | Sequence (5' to 3')            |
|---------|--------------------------------|
| SDHB_1F | GCGACCTCGGGGTTAAG              |
| SDHB_1R | TCCCTCTCTGAGGCTCCA             |
| SDHB_2F | CCAGCAAAATGGAATTATCTTGTATTTCTA |
| SDHB_2R | CTCCTTCAATAGCTGGCTT            |
| SDHB_3F | GGTTGAACGTTACATAAATACCACT      |
| SDHB_3R | TATCTGGAGCCCAACAGGA            |
| SDHB_4F | GGATATGGGTGAGGATGTGTAA         |
| SDHB_4R | TAGCGTAACACACATAGCACTG         |
| SDHB_5F | GTGATGATGGAATCTGATCCTTT        |
| SDHB_5R | AATTCTTCAGATTGAAACAATAAATAGGG  |
| SDHB_6F | AGCTCCTGCCTCTCTTT              |
| SDHB_6R | GGATGCTTGAGTTTCAATTTCTCTTA     |
| SDHB_7F | CAGCTAATCATCCCTGGTT            |
| SDHB_7R | CTCTGAGGCAGAGCTGAG             |
| SDHB_8F | CAGTTTCAGTTATCATTGTTATTGATTC   |
| SDHB_8R | CTGAGCTGGTTATAAATCATGTTTAG     |
| SDHC_1F | AGAGACTCTCGTCACATGACA          |
| SDHC_1R | ACTCCAGTCCCCTGAA               |
| SDHC_2F | ATACTAAAGTTGATCTCTAAATGTGTATTG |
| SDHC_2R | AATAAATAATCTCCAGACTTAGAACTTAC  |
| SDHC_3F | TTAGTTATTTTCAAACGGTCTGGT       |
| SDHC_3R | TCTCTGGCTCCAGAATCC             |
| SDHC_4F | GATAGACTCTCTACTATGGTGTCA       |
| SDHC_4R | AAAGAAGCACATATGTGTGTGTAA       |
| SDHC_5F | CTGTGACAAGCTACTTGGTT           |
| SDHC_5R | CTTACAGAGAAAATGTGCAAATC        |
| SDHC_6F | GAAGTGTAAATGTCCTATTTACTGAAATTC |
| SDHC_6R | CAGGTACTCTACTGCTCCAAG          |
| SDHD_1F | TAAGTGGTTCCGGGTTGG             |
| SDHD_1R | CACCTCAGGGTGGGAAG              |
| SDHD_2F | CCTGTTAAAGGAGAGGTTCTTAT        |
| SDHD_2R | CAGAAAGCAGCAGCGAT              |
| SDHD_3F | TGTGTGTTTCTCACATCAACTTT        |
| SDHD_3R | ACTGAGCAGACAATATATTTGG         |
| SDHD_4F | GTATAGTCTTCTAATTTCACTGTGGT     |
| SDHD_4R | GCAAAGAGGCATACATCAATTC         |
