# Supplementary material
Source: PubMed Central journal article supplement (PMC4335377)
Supplement: supp_22.2.121_Supplementary_table_2.pdf [file supp_22.2.121_Supplementary_table_2.pdf]

**Supplemental Table 2.** List of somatic duplication regions in chromosome 1 from TCGA THCA samples

| <b>Chr</b> | <b>Start</b> | <b>End</b> | <b>#Probe</b> | <b>Sample</b> |
|------------|--------------|------------|---------------|---------------|
| 1          | 3218610      | 247813706  | 129135        | A3I5          |
| 1          | 120523902    | 247813706  | 61339         | A3MZ          |
| 1          | 120527361    | 247813706  | 61319         | A40L          |
| 1          | 149879545    | 163164485  | 7381          | A3GU          |
| 1          | 149879545    | 196004553  | 28325         | A192          |
| 1          | 149879545    | 237413292  | 54817         | A13U          |
| 1          | 149879545    | 239264404  | 56403         | A3O3          |
| 1          | 149879545    | 247813706  | 61287         | A3ZO          |
| 1          | 149881398    | 165391382  | 9039          | A4MD          |
| 1          | 149881398    | 197319745  | 28589         | A4EU          |
| 1          | 149881398    | 247813706  | 61316         | A3T9          |
| 1          | 149881398    | 247813706  | 61338         | A3O1          |
| 1          | 149881398    | 247813706  | 60623         | A4IB          |
| 1          | 149881398    | 247813706  | 61343         | A231          |
| 1          | 149881398    | 247813706  | 61253         | A3GP          |
| 1          | 149881398    | 247813706  | 61249         | A3EB          |
| 1          | 149881398    | 247813706  | 61296         | A290          |
| 1          | 149884927    | 165391382  | 8947          | A4MD          |
| 1          | 149884927    | 238649757  | 55254         | A4MC          |
| 1          | 149884927    | 247813706  | 60609         | A4MB          |
| 1          | 149898951    | 169949913  | 12508         | A39P          |
| 1          | 150033345    | 247813706  | 61008         | A4B0          |
| 1          | 154609657    | 247813706  | 59157         | A3NM          |
| 1          | 158514944    | 220761607  | 39966         | A3H5          |
| 1          | 158728389    | 215338184  | 35794         | A4JX          |
| 1          | 3218610      | 247813706  | 129135        | A3I5          |
| 1          | 120523902    | 247813706  | 61339         | A3MZ          |
| 1          | 120527361    | 247813706  | 61319         | A40L          |
| 1          | 149879545    | 163164485  | 7381          | A3GU          |
| 1          | 149879545    | 196004553  | 28325         | A192          |
| 1          | 149879545    | 237413292  | 54817         | A13U          |
| 1          | 149879545    | 239264404  | 56403         | A3O3          |
| 1          | 149879545    | 247813706  | 61287         | A3ZO          |

|   |           |           |       |      |
|---|-----------|-----------|-------|------|
| 1 | 149881398 | 165391382 | 9039  | A4MD |
| 1 | 149881398 | 197319745 | 28589 | A4EU |
| 1 | 149881398 | 247813706 | 61316 | A3T9 |
| 1 | 149881398 | 247813706 | 61338 | A3O1 |
| 1 | 149881398 | 247813706 | 60623 | A4IB |
| 1 | 149881398 | 247813706 | 61343 | A231 |
| 1 | 149881398 | 247813706 | 61253 | A3GP |
| 1 | 149881398 | 247813706 | 61249 | A3EB |
| 1 | 149881398 | 247813706 | 61296 | A290 |
| 1 | 149884927 | 165391382 | 8947  | A4MD |
| 1 | 149884927 | 238649757 | 55254 | A4MC |
| 1 | 149884927 | 247813706 | 60609 | A4MB |
| 1 | 149898951 | 169949913 | 12508 | A39P |
| 1 | 150033345 | 247813706 | 61008 | A4B0 |
| 1 | 154609657 | 247813706 | 59157 | A3NM |
| 1 | 158514944 | 220761607 | 39966 | A3H5 |
| 1 | 158728389 | 215338184 | 35794 | A4JX |

---
