# Supplementary material
Source: PubMed Central journal article supplement (PMC4335377)
Supplement: supp_22.2.121_Supplementary_table_3.pdf [file supp_22.2.121_Supplementary_table_3.pdf]

**Supplemental Table 3.** Statistical correlation between *PTEN*, *SDHA*, *SDHB*, *SDHC*, and *SDHD* gene expression from TCGA THCA data

**Correlations**

|             |                            | <b>PTEN</b> | <b>SDHA</b> | <b>SDHB</b> | <b>SDHC</b> | <b>SDHD</b> |
|-------------|----------------------------|-------------|-------------|-------------|-------------|-------------|
| <b>PTEN</b> | <b>Pearson Correlation</b> | 1           | .157**      | .072        | .247**      | .187**      |
|             | <b>Sig. (2-tailed)</b>     |             | .001        | .121        | .000        | .000        |
|             | <b>N</b>                   | 466         | 466         | 466         | 466         | 466         |
| <b>SDHA</b> | <b>Pearson Correlation</b> | .157**      | 1           | .864**      | .609**      | .693**      |
|             | <b>Sig. (2-tailed)</b>     | .001        |             | .000        | .000        | .000        |
|             | <b>N</b>                   | 466         | 466         | 466         | 466         | 466         |
| <b>SDHB</b> | <b>Pearson Correlation</b> | .072        | .864**      | 1           | .617**      | .730**      |
|             | <b>Sig. (2-tailed)</b>     | .121        | .000        |             | .000        | .000        |
|             | <b>N</b>                   | 466         | 466         | 466         | 466         | 466         |
| <b>SDHC</b> | <b>Pearson Correlation</b> | .247**      | .609**      | .617**      | 1           | .681**      |
|             | <b>Sig. (2-tailed)</b>     | .000        | .000        | .000        |             | .000        |
|             | <b>N</b>                   | 466         | 466         | 466         | 466         | 466         |
| <b>SDHD</b> | <b>Pearson Correlation</b> | .187**      | .693**      | .730**      | .681**      | 1           |
|             | <b>Sig. (2-tailed)</b>     | .000        | .000        | .000        | .000        |             |
|             | <b>N</b>                   | 466         | 466         | 466         | 466         | 466         |

\*\* . Correlation is significant at the 0.01 level (2-tailed).
